# Supplementary material for: Comparing De Novo Genome Assembly: The Long and Short of It
Source: PubMed Central journal article supplement (PMC3084767; doi:10.1371/journal.pone.0019175), 2011-04-29
Supplement: pone.0019175.s002.pdf [file pone.0019175.s002.pdf]

Table S2: Short Read Assemblers parameter setting.

| Assembler  | <i>S. aureus</i>                           | <i>H. acininychis</i>                      | <i>E. coli</i>                                |
|------------|--------------------------------------------|--------------------------------------------|-----------------------------------------------|
| ABYSS      | k=23                                       | k=27                                       | k=31 n=5                                      |
| Edena      | m=21                                       | m=27                                       | m=30                                          |
| EULER-SR   | k=21                                       | k=27                                       | k=28 CloneLength=215 CloneVar=40              |
| SOAPdenovo | k =21                                      | k=27                                       | k=25 -R                                       |
| SSAKE      | default                                    | default                                    | m=17 o=4 r=0.7 t=1                            |
| SUTTA      | k=21 $W_{mp}=150$ $W_{de}=10$ $W_{bb}=140$ | k=27 $W_{mp}=150$ $W_{de}=30$ $W_{bb}=140$ | k=29 $W_{mp}=150$ $W_{de}=20$ $W_{bb}=140$    |
| Taipan     | k=19 T=8                                   | k=27 T=18                                  | k=29 T=10                                     |
| Velvet     | k =21 cov_cutoff=7                         | k=27 cov_cutoff=8                          | k=29 ins_length=215 cov_cutoff=12 -exp_cov=24 |

NOTE: Long-read Assemblers have been ran with their default parameters.
